# Supplementary material
Source: Springer Nature journal article supplement (https://www.springermedizin.de/resource/supplementary/12876_2010_554_MOESM1_ESM.pdf/9437244)

Computer-aided search revealed studies N=1310

Irrelevant titles and abstracts, and repetitive  
presence in more than database N=1209

Potential full texts for included N=101

Non-original research N=10;  
Not reporting the diagnostic performance of liver or peritoneal  
metastasis N=29;  
Insufficient data N=11;  
Included patients with non-adenocarcinoma N= 6;  
Included patients with gastric carcinoma confined to a specific part  
of the stomach N=11  
Included patients received neoadjuvant chemotherapy N=1

Eligible studies N=33

US studies  
N=8

EUS studies  
N=5

CT studies  
N=22

MRI studies  
N=2

18F-FDG PET  
studies N=5

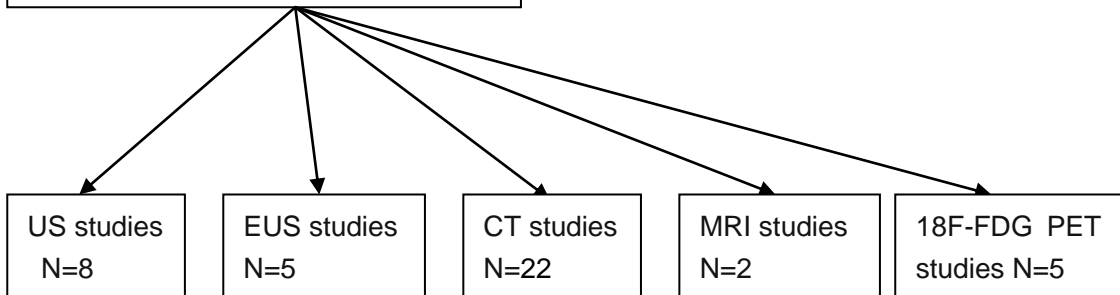

Supplement: MOESM1 [file 9437244]
